# Supplementary material for: Barriers to childhood immunization in sub-Saharan Africa: A systematic review
Source: Springer Nature journal article supplement (doi:10.1186/s12889-020-09169-4), 2020-07-14
Supplement: MOESM1 [file 18182224]

## Supplementary Materials

1. Database search terms and history
2. Methodological Quality Assessment tool for Qualitative and Quantitative studies
3. Full-text articles excluded with reasons
4. Change of authorship request form

### 1. Database search terms and history

#### a) Embase search terms and history:

**53** ('child'/exp OR child OR 'children'/exp OR children OR 'childhood'/exp OR childhood OR 'infant'/exp OR infant OR 'baby'/exp OR baby OR 'newborn'/exp OR newborn) AND ('immunization'/exp OR immunization OR 'immunisation'/exp OR immunisation OR 'vaccination'/exp OR vaccination OR 'vaccine'/exp OR vaccine OR 'immunity'/exp OR immunity) AND (('barrier'/exp OR barrier OR hesitant OR 'refuse'/exp OR refuse OR refusal OR delay OR 'denial'/exp OR denial OR denier OR denied OR concern OR reason OR 'doubt'/exp OR doubt) AND 'non acceptance' OR incomplete OR obstacle OR 'constraint'/exp OR constraint) AND ((sub AND saharan AND ('africa'/exp OR africa) OR 'angola'/exp OR angola OR 'benin'/exp OR benin OR 'botswana'/exp OR botswana OR 'burkina faso'/exp OR 'burkina faso' OR 'burundi'/exp OR burundi OR 'cabo verde'/exp OR 'cabo verde' OR 'cameroon'/exp OR cameroon OR 'central african republic'/exp OR 'central african republic' OR 'equatorial guinea'/exp OR 'equatorial guinea' OR 'eritrea'/exp OR eritrea OR 'ethiopia'/exp OR ethiopia OR 'gabon'/exp OR gabon OR 'gambia'/exp OR gambia OR 'ghana'/exp OR ghana OR 'guinea'/exp OR guinea OR 'guinea-bissau'/exp OR 'guinea-bissau' OR 'kenya'/exp OR kenya OR 'lesotho'/exp OR lesotho OR 'liberia'/exp OR liberia OR 'madagascar'/exp OR madagascar OR 'malawi'/exp OR malawi OR 'mali'/exp OR mali OR 'mauritania'/exp OR mauritania OR 'mauritius'/exp OR mauritius OR 'mozambique'/exp OR mozambique OR 'namibia'/exp OR namibia OR 'niger'/exp OR niger OR 'nigeria'/exp OR nigeria OR 'rwanda'/exp OR rwanda OR 'senegal'/exp OR senegal OR sierra) AND leone OR 'somalia'/exp OR somalia OR 'south africa'/exp OR 'south africa' OR 'south sudan'/exp OR 'south sudan' OR 'sudan'/exp OR sudan OR 'tanzania'/exp OR tanzania OR 'togo'/exp OR togo OR 'uganda'/exp OR uganda OR 'zambia'/exp OR zambia OR 'zimbabwe'/exp OR zimbabwe) AND [article]/lim AND [humans]/lim AND ([embase]/lim OR [medline]/lim)

#### b) Web of Science search terms and history:

**1,985** TS=((child or children or childhood or infant or baby or newborn) and (immunization or immunisation or vaccination or vaccine or immunity) and (barrier or hesitant or refuse or refusal or delay or denial or denier or denied or concern or reason or doubt "non acceptance" or incomplete or obstacle or constraint) and (Sub Saharan Africa or Angola or Benin or Botswana or "Burkina Faso" or Burundi or "Cabo Verde" or Cameroon or "Central African Republic" or Chad or Comoros or Congo or "Cote d'Ivoire" or "Equatorial Guinea" or Eritrea or Ethiopia or Gabon or Gambia or Ghana or Guinea or "Guinea-Bissau" or Kenya or Lesotho or Liberia or Madagascar or Malawi or Mali or Mauritania or Mauritius or Mozambique or Namibia or Niger or Nigeria or Rwanda or Senegal or Sierra Leone or Somalia or "South Africa" or "South Sudan" or Sudan or Tanzania or Togo or Uganda or Zambia or Zimbabwe))

*Databases= WOS, BCI, KJD, MEDLINE, RSCI, SCIELO Timespan=All years; Search language=Auto*

#### c) PubMed search terms and history

| Search | Query                                  | Items found |
|--------|----------------------------------------|-------------|
| #14    | Search (((#3) AND #6) AND #10) AND #13 | 614         |
| #13    | Search (#11) OR #12                    | 369841      |



## 2. Modified Methodological Quality Assessment tool for Qualitative and Quantitative studies

### Appraisal questions:

1. Did the study address a clearly focused question / issue?
2. Is the research method (study design) appropriate for answering the research question?
3. Is the method of selection of the subjects (employees, teams, divisions, organizations) clearly described?
4. Could the way the sample was obtained introduce (selection) bias?
5. Was the sample of subjects' representative with regard to the population to which the findings will be referred?
6. Were the data collected in a way that addressed the research issue?
7. Was the sample size based on pre-study considerations of statistical power?
8. Was a satisfactory response rate achieved?
9. Are the measurements (questionnaires) likely to be valid and reliable?
10. Have ethical issues been taken into consideration?
11. Was the data analysis sufficiently rigorous?
12. Was the statistical significance assessed?
13. Is there a clear statement of findings?
14. Can the results be applied to your organization or field of study?

**Key:** NA: Not Applicable; NC: Not Clear; N: No; Y: Yes

| Modified Methodological Quality Assessment tool for Qualitative and Quantitative studies |                     |   |   |   |   |   |    |   |    |    |    |    |    |    |              |                |
|------------------------------------------------------------------------------------------|---------------------|---|---|---|---|---|----|---|----|----|----|----|----|----|--------------|----------------|
| Article, year                                                                            | Appraisal questions |   |   |   |   |   |    |   |    |    |    |    |    |    | Remarks      |                |
|                                                                                          | 1                   | 2 | 3 | 4 | 5 | 6 | 7  | 8 | 9  | 10 | 11 | 12 | 13 | 14 | Total scores | Quality status |
| Tadesse et al [1], 2009                                                                  | Y                   | Y | Y | N | Y | Y | NA | Y | NC | N  | Y  | NA | Y  | Y  | 10           | Moderate       |
| Phillips et al [2], 2018                                                                 | Y                   | Y | Y | N | Y | Y | Y  | Y | Y  | Y  | Y  | Y  | Y  | Y  | 14           | High           |
| Oliver et al [3], 2014                                                                   | Y                   | Y | Y | N | Y | Y | Y  | Y | Y  | Y  | Y  | Y  | Y  | Y  | 14           | High           |
| Wiysonge et al [7], 2012                                                                 | Y                   | Y | Y | N | Y | Y | Y  | Y | Y  | Y  | Y  | Y  | Y  | Y  | 14           | High           |
| Yemesrach et al [11], 2018                                                               | Y                   | Y | Y | N | Y | Y | Y  | N | Y  | Y  | Y  | Y  | Y  | Y  | 14           | High           |
| Porth et al [12], 2019                                                                   | Y                   | Y | Y | N | Y | Y | Y  | Y | Y  | Y  | Y  | Y  | Y  | Y  | 13           | High           |
| Elizabeth et al [13], 2015                                                               | Y                   | Y | Y | N | Y | Y | Y  | Y | Y  | Y  | Y  | Y  | Y  | Y  | 14           | High           |
| Cockcroft et al [14], 2014                                                               | Y                   | Y | Y | N | Y | Y | Y  | Y | Y  | Y  | Y  | Y  | Y  | Y  | 14           | High           |
| Sylvie et al [15], 2018                                                                  | Y                   | Y | Y | N | Y | Y | Y  | Y | Y  | Y  | Y  | Y  | Y  | Y  | 14           | High           |
| Zewdie et al [16], 2016                                                                  | Y                   | Y | Y | N | Y | Y | NA | Y | NC | Y  | Y  | NA | Y  | Y  | 11           | Moderate       |

|                                     |   |   |   |    |   |   |    |   |    |   |   |    |   |   |    |          |
|-------------------------------------|---|---|---|----|---|---|----|---|----|---|---|----|---|---|----|----------|
| Juliet et al, <sup>17</sup><br>2011 | Y | Y | Y | N  | Y | Y | NA | Y | Y  | Y | Y | NA | Y | Y | 12 | High     |
| Miyahara et al [18], 2016           | Y | Y | Y | N  | Y | Y | Y  | Y | NC | Y | Y | Y  | Y | Y | 13 | High     |
| Pertet et al [19], 2018             | Y | Y | Y | N  | Y | Y | Y  | Y | Y  | Y | Y | Y  | Y | Y | 14 | High     |
| Yenit et al [20], 2018              | Y | Y | Y | N  | Y | Y | Y  | Y | Y  | Y | Y | Y  | Y | Y | 14 | High     |
| Tugumisirize et al [21], 2002       | Y | Y | Y | N  | Y | Y | N  | Y | Y  | Y | Y | Y  | Y | Y | 13 | High     |
| Babalola S [22], 2011               | y | Y | Y | N  | Y | Y | Y  | Y | Y  | Y | Y | Y  | Y | Y | 14 | High     |
| Oladokun et al [23], 2010           | Y | Y | Y | N  | Y | Y | Y  | Y | Y  | Y | Y | Y  | Y | Y | 14 | High     |
| Schwarz et al [24], 2009            | Y | Y | Y | Y  | Y | Y | N  | Y | NC | Y | Y | NA | Y | Y | 10 | Moderate |
| Ismail et al [25], 2014             | Y | Y | Y | N  | Y | Y | Y  | Y | Y  | Y | Y | Y  | Y | Y | 14 | High     |
| Rees et al [26], 1991               | y | Y | Y | N  | Y | Y | Y  | Y | Y  | Y | Y | N  | Y | Y | 13 | High     |
| Nadella et al [27], 2019            | Y | Y | Y | N  | Y | Y | Y  | Y | Y  | Y |   | Y  | Y | Y | 14 | High     |
| Meleko et al [28], 2017             | Y | Y | Y | N  | Y | Y | Y  | Y | Y  | Y | Y | Y  | Y | Y | 14 | High     |
| Itimi et al [29], 2012              | Y | Y | Y | N  | Y | Y | Y  | Y | Y  | Y | Y | Y  | Y | Y | 14 | High     |
| Kagoné et al [30], 2018             | Y | Y | Y | NC | Y | Y | NA | Y | Y  | Y | Y | NA | Y | Y | 11 | Moderate |
| Tobin-West et al [31], 2012         | Y | Y | Y | N  | Y | Y | Y  | Y | Y  | Y | Y | Y  | Y | Y | 14 | High     |
| Braka et al [32], 2011              | Y | Y | Y | N  | Y | Y | N  | Y | Y  | Y | Y | NA | Y | Y | 12 | High     |
| Ambe et al [33], 2001               | Y | Y | Y | N  | Y | Y | N  | Y | Y  | Y | Y | Y  | Y | Y | 12 | High     |
| Tadesse et al [34], 2009            | Y | Y | Y | N  | Y | Y | Y  | Y | Y  | Y | Y | Y  | Y | Y | 14 | High     |
| Jani et al [35], 2008               | Y | Y | Y | N  | Y | Y | N  | Y | Y  | Y | Y | Y  | Y | Y | 13 | High     |

|                                     |   |   |   |    |   |   |    |    |    |    |   |    |   |   |    |          |
|-------------------------------------|---|---|---|----|---|---|----|----|----|----|---|----|---|---|----|----------|
| Eng et al [36], 1991                | Y | Y | Y | NC | Y | Y | N  | Y  | Y  | Y  | Y | N  | Y | Y | 11 | Moderate |
| Landoh et al [37], 2016             | Y | Y | Y | N  | Y | Y | N  | Y  | Y  | Y  | Y | Y  | Y | Y | 14 | High     |
| Legesse et al [38], 2015            | Y | Y | Y | N  | Y | Y | Y  | Y  | Y  | Y  | Y | Y  | Y | Y | 14 | High     |
| Wemakor et al [39], 2018            | Y | Y | Y | N  | Y | Y | Y  | Y  | Y  | Y  | Y | Y  | Y | Y | 14 | High     |
| Adedokunlet al [40], 2017           | Y | Y | Y | N  | Y | Y | NC | NC | NA | NA | Y | Y  | Y | Y | 10 | Moderate |
| Chidiebere et al [41], 2014         | Y | Y | Y | N  | Y | Y | NC | NC | NA | NA | Y | Y  | Y | Y | 10 | Moderate |
| Ekouevi et al [42], 2018            | Y | Y | Y | N  | Y | Y | Y  | Y  | Y  | Y  | Y | Y  | Y | Y | 14 | High     |
| Tadess et al [43], 2017             | Y | Y | Y | N  | Y | Y | N  | Y  | Y  | Y  | Y | NA | Y | Y | 12 | High     |
| Negussie et al [44], 2016           | Y | Y | Y | N  | Y | Y | Y  | Y  | Y  | Y  | Y | Y  | Y | Y | 14 | High     |
| Bosu et al [45], 1997               | Y | Y | Y | N  | Y | Y | Y  | Y  | Y  | N  | Y | N  | Y | Y | 14 | High     |
| Desgrées du Loû et al [46], 1994    | Y | Y | Y | Y  | Y | Y | N  | Y  | NC | N  | Y | Y  | Y | Y | 10 | Moderate |
| Sato R. [47], 2019                  | Y | Y | Y | N  | Y | Y | N  | NA | NA | N  | Y | Y  | Y | Y | 10 | Moderate |
| Akwataghibe, N. N. et al [48], 2019 | Y | Y | Y | N  | Y | Y | Y  | Y  | Y  | Y  | Y | Y  | Y | Y | 14 | High     |
| Yismaw, A. E. et al [49], 2019      | Y | Y | Y | N  | Y | Y | Y  | Y  | Y  | Y  | Y | Y  | Y | Y | 14 | High     |
| Ntenda P. [50], 2019                | Y | Y | Y | N  | Y | Y | N  | Y  | Y  | Y  | Y | Y  | Y | Y | 13 | High     |
| Okenwa, U. J. et al [51], 2019      | Y | Y | Y | N  | Y | Y | Y  | Y  | Y  | Y  | Y | Y  | Y | Y | 14 | High     |
| Mthiyane, T. N et al [52], 2019     | Y | Y | Y | N  | Y | Y | Y  | Y  | Y  | Y  | Y | Y  | Y | Y | 14 | High     |
| Mekonnen, A. G. et al [53], 2019    | Y | Y | Y | N  | Y | Y | Y  | Y  | Y  | Y  | Y | Y  | Y | Y | 14 | High     |

|                               |   |   |   |   |   |   |   |   |   |   |   |   |   |   |   |    |      |
|-------------------------------|---|---|---|---|---|---|---|---|---|---|---|---|---|---|---|----|------|
| Ibraheem, R. et al [54], 2019 | Y | Y | Y | N | Y | Y | Y | Y | Y | Y | Y | Y | Y | Y | Y | 14 | High |
|-------------------------------|---|---|---|---|---|---|---|---|---|---|---|---|---|---|---|----|------|

### 3. Full-text articles excluded with reasons (n=28)

| No | Author, year         | Title                                                                                                                                                               | Reason for exclusion                             |
|----|----------------------|---------------------------------------------------------------------------------------------------------------------------------------------------------------------|--------------------------------------------------|
| 1  | Aloysius R. 2016     | Reasons for non-timely completion of the routine infant immunization schedule by children in rural South West Uganda                                                | Letter to the editor                             |
| 2  | Bukenya et al, 1991  | Possible reasons for non-completion of immunization in an urban settlement of Papua New Guinea.                                                                     | Conducted in another region                      |
| 3  | Bender D et al, 1988 | Immunization drop-outs and maternal behavior: evaluation of reasons given and strategies for maintaining gains made in the national vaccination campaign in Liberia | Full text not accessed                           |
| 4  | Adeloye et al, 2017  | Coverage and determinants of childhood immunization in Nigeria: A systematic review and meta-analysis.                                                              | Review                                           |
| 5  | Namuigi et al, 2005  | Barriers to measles immunization: the beliefs and attitudes of caregivers in Goroka, Eastern Highlands Province, Papua New Guinea                                   | Conducted in another region                      |
| 6  | Downing et al, 2018  | Barriers to the delivery of the hepatitis B birth dose: a study of five Papua New Guinean hospitals in 2007.                                                        | Conducted in another region                      |
| 7  | Craciun et al, 2012  | "Who will take the blame?": Understanding the reasons why Romanian mothers decline HPV vaccination for their daughters                                              | Conducted in another region                      |
| 8  | Dammann et al, 1990  | Vaccination--coverage of under-fives, validity of records, and the impact of mass campaigns in the Edendale/Vulindlela district of KwaZulu                          | Focusing on vaccination records validity         |
| 9  | Sackou et al, 2012   | Complete immunization coverage and reasons for non-vaccination in a periurban area of Abidjan                                                                       | Full text not available in English               |
| 10 | Douba et al, 2015    | Sociodemographic factors associated with incomplete immunization of children aged 12 to 59 months in six West African countries                                     | Full text not available in English               |
| 11 | Nasiru et al,        | Breaking community barriers to polio vaccination in northern Nigeria: the impact of a grass roots mobilization campaign (Majigi).                                   | Focusing on impact of a grass roots mobilization |
| 12 | Sackou et al, 1990   | Complete immunization coverage and reasons for non-vaccination in a periurban area of Abidjan                                                                       | Full text not accessed                           |
| 13 | Mwamba et al, 2017   | Vaccination coverage and factors influencing routine vaccination status in 12 high risk health zones in the Province of Kinshasa City, Democratic                   | supplement paper                                 |

|    |                                        |                                                                                                                                                     |                                                                                 |
|----|----------------------------------------|-----------------------------------------------------------------------------------------------------------------------------------------------------|---------------------------------------------------------------------------------|
|    |                                        | Republic of Congo (DRC), 2015                                                                                                                       |                                                                                 |
| 14 | Olorunsaiye et al, 2017                | Missed opportunities and barriers for vaccination: a descriptive analysis of private and public health facilities in four African countries         | Supplement paper                                                                |
| 15 | Michael et al, 2014                    | An Assessment of the Reasons for Oral Poliovirus Vaccine Refusals in Northern Nigeria                                                               | Supplement paper                                                                |
| 16 | Burnett et al., 2018                   | Impact of vaccine stock-outs on infant vaccination coverage: a hospital-based survey from South Africa                                              | Focus on impact of vaccine stock-outs                                           |
| 17 | Jalloh et al, 2019                     | Rapid behavioral assessment of barriers and opportunities to improve vaccination coverage among displaced Rohingyas in Bangladesh, January 2018     | Conducted in another region                                                     |
| 18 | Koruk et al, 2013                      | A case of childhood vaccination barrier: migrant and seasonal farmworkers                                                                           | Conducted in another region                                                     |
| 19 | Ports et al, 2013                      | Barriers and Facilitators to HPV Vaccination: Perspectives from Malawian Women                                                                      | Focus on adult vaccines                                                         |
| 20 | Attia et al, 2018                      | On surmounting the barriers to HPV vaccination: we can do better                                                                                    | Focus on adult vaccines                                                         |
| 21 | Sato R. 2019                           | Barriers and facilitators of immunisation in refugees and migrants in Australia: an east-African case study                                         | Conducted in another region                                                     |
| 22 | Carter, E. D., et al. 2019             | Impact of vaccination delay on deaths averted by pneumococcal conjugate vaccine: Modeled effects in 8 country scenarios                             | Focus on impact of vaccination delay on deaths                                  |
| 23 | Ferreras, E., et al. 2016              | Delayed second dose of oral cholera vaccine administered before high-risk period for cholera transmission: Cholera control strategy in Lusaka, 2016 | Included adults                                                                 |
| 24 | Hajizadeh M. et al 2019                | Decomposing socioeconomic inequality in child vaccination in the Gambia, the Kyrgyz Republic and Namibia                                            | Focus on socioeconomic inequalities                                             |
| 25 | Ko, L. K. et al 2019                   | "We brought our culture here with us": A qualitative study of perceptions of HPV vaccine and vaccine uptake among East African immigrant mothers    | Focus on adult vaccines                                                         |
| 26 | Madlon-Kay, D. J., & Smith, E. R. 2019 | Interpreters' knowledge and perceptions of childhood vaccines: Effect of an educational session                                                     | Focus on effects of an educational session on interpreter beliefs and knowledge |
| 27 | Tambe, T. A. et al, 2019               | Reasons for non-compliance to immunization among Fulani children aged between 0-11 months in the Vekovi community in Cameroon                       | Letter to the editor                                                            |
| 28 | Hvass, A. M. F. & Wejse, C. 2019       | High coverage of polio immunization program in refugees resettling in Denmark. A cross-sectional study of polio serology in newly arrived refugees  | Conducted in another region                                                     |

## References

1. **Aloysius R.** Reasons for non-timely completion of the routine infant immunization schedule by children in rural South West Uganda. *Canadian journal of public health. Revue canadienne de santé publique* January 2016 DOI: 10.17269/CJPH.106.5393
2. **Bukenya, GB and Freeman PA** Possible reasons for non-completion of immunization in an urban settlement of Papua New Guinea. *Papua and New Guinea medical journal. Vol.1.22-5.1991-Mar*
3. **Bender D and Macauley RJ** Immunization drop-outs and maternal behavior: evaluation of reasons given and strategies for maintaining gains made in the national vaccination campaign in Liberia. *International quarterly of community health education. Vol. 9 (1988) 283-98*
4. **Adeloye DJ, Wura A, Ann O, Ogundipe O, Mosaku O, Gadanya MA, Oni G,** Coverage and determinants of childhood immunization in Nigeria: A systematic review and meta-analysis. *Vaccine. Vol. 35 (2017) 2871-2881*
5. **Namuigi P, Phuanukoannon S.** Barriers to measles immunization: the beliefs and attitudes of caregivers in Goroka, Eastern Highlands Province, Papua New Guinea. *Papua New Guinea Medical Journal Vol. 48(2005) 183-187*
6. **Downing SG, Lagani W, Guy R, Hellard M** Barriers to the delivery of the hepatitis B birth dose: a study of five Papua New Guinean hospitals in 2007. *Papua New Guinea Medical Journal. Vol. 51 (2018) 47-55*
7. **Craciun C, Baban A** "Who will take the blame?": Understanding the reasons why Romanian mothers decline HPV vaccination for their daughters. *Vaccine. Vol. 30 (2012) 6789-6793*
8. **Dammann DF, Solarsh GC, Patrick ME, Ijsselmuiden CB** Vaccination--coverage of under-fives, validity of records, and the impact of mass campaigns in the Edendale/Vulindlela district of KwaZulu. *South African medical journal. Vol.78 (1990) 12:729-33*
9. **Sackou KJ, Oga ASS, Desquith AA, Houenou Y, Kouadio KL.** Complete immunization coverage and reasons for non-vaccination in a periurban area of Abidjan. *Bulletin de la Societe de pathologie exotique Vol. 105 (2012) 4: 284-90*
10. **Douba A, Aka LB, Yao GH, Zengbe-Acray P, Akani B C, Konan NG.** Sociodemographic factors associated with incomplete immunization of children aged 12 to 59 months in six West African countries. *Sante Publique. Vol.27(2015) 4:575-84*
11. **Nasiru S, Aliyu, Gambo G, Gasasira AA, Muktar H, Zubair MM, Sunusi UW, Hassana N, Abdulsalami E, Samer S** Breaking community barriers to polio vaccination in northern Nigeria: the impact of a grass roots mobilization campaign (Majigi). *Pathogens and Global Health. Vol. 106 (2012) 3:166-171*
12. **Sackou K J, Oga ASS, Desquith AA, Houenou Y, Kouadio KL.** Complete immunization coverage and reasons for non-vaccination in a periurban area of Abidjan. *Bulletin de la Societe de pathologie exotique. Vol. 105 (1990) 4: 284-90*
13. **Mwamba GN, Yoloyolo N, Masembe Y, Nsambu MN, Nzuzi C, Tshkoya P, Dah B, Kaya G.** Vaccination coverage and factors influencing routine vaccination status in 12 high risk health zones in the Province of Kinshasa City, Democratic Republic of Congo (DRC), 2015. *The Pan African Medical Journal Vol.27 (2017) 3: 7-7*
14. **Olorunsaiye CZ, Langhamer MS, Wallace AS, Watkins ML** Missed opportunities and barriers for vaccination: a descriptive analysis of private and public health facilities in four African countries. *The Pan African medical journal. Vol. 27 (2017)S3: 6-6*
15. **Michael CA, Ogbuanu IU, Storms AD, Ohuabunwo CJ, Corkum M, Ashenafi S, Achari P, Biya O, Nguku P, Mahoney F.** An Assessment of the Reasons for Oral Poliovirus Vaccine Refusals in Northern Nigeria. *Journal of Infectious Diseases. Vol.210 (2014) S125-S130*



16. **Burnett RJ, Mmoledi G, Ngcobo NJ, Dochez C, Seheri LM, Mphahlele MJ.** Impact of vaccine stock-outs on infant vaccination coverage: a hospital-based survey from South Africa *International Health*. Vol. 10 (2018)5: 376-381
17. **Jalloh MF, Bennett SD, Alam D, Kouta P, Lourenco D, Alamgir M, Feldstein LR, Ehlman D. C, Abad, N, Kapil N, Vandenant, M, Conklin L, Wolff B.** Rapid behavioral assessment of barriers and opportunities to improve vaccination coverage among displaced Rohingyas in Bangladesh, January 2018. *Vaccine*. Vol.37 (2019)6:833-838
18. **Koruk I, Simsek Z, Koruk STA** Case of childhood vaccination barrier: migrant and seasonal farmworkers. *Turkish Journal of Medical Science*. Vol. 43(2013)3: 424-429
19. **Ports KA, Reddy DM, Rameshbabu, A.** Barriers and Facilitators to HPV Vaccination: Perspectives from Malawian Women. *Women & Health*. Vol. 53(2013) 6: 630-645
20. **Attia AC, Wolf J, Nunez AE** On surmounting the barriers to HPV vaccination: we can do better. *Annals of Medicine*. Vol.50 (2018) 3:209-225
21. **Abdi, I., Menzies, R., & Seale, H. (2019).** Barriers and facilitators of immunisation in refugees and migrants in Australia: an east-African case study. *Vaccine*, 37(44), 6724–6729. doi:10.1016/j.vaccine.2019.09.025
22. **Carter, E. D., Tam, Y., & Walker, N. (2019).** Impact of vaccination delay on deaths averted by pneumococcal conjugate vaccine: Modeled effects in 8 country scenarios. *Vaccine*, 37(36), 5242–5249. doi:10.1016/j.vaccine.2019.07.063
23. **Ferreras, E., Matapo, B., Chizema-Kawesha, E., Chewe, O., Mzyece, H., Blake, A., Pezzoli, L. (2019).** Delayed second dose of oral cholera vaccine administered before high-risk period for cholera transmission: Cholera control strategy in Lusaka, 2016. *PloS one*, 14(8), e0219040. doi:10.1371/journal.pone.0219040
24. **Hajizadeh M. (2019).** Decomposing socioeconomic inequality in child vaccination in the Gambia, the Kyrgyz Republic and Namibia, *Vaccine*, 37(44), 6609–6616. doi:10.1016/j.vaccine.2019.09.054
25. **Ko, L. K., Taylor, V. M., Mohamed, F. B., Do, H. H., Gebeyaw, F. A., Ibrahim, A., ... Winer, R. L. (2019).** "We brought our culture here with us": A qualitative study of perceptions of HPV vaccine and vaccine uptake among East African immigrant mothers. *Papillomavirus research* (Amsterdam, Netherlands), 7, 21–25. doi:10.1016/j.pvr.2018.12.003
26. **Madlon-Kay, D. J., & Smith, E. R. (2019).** Interpreters' knowledge and perceptions of childhood vaccines: Effect of an educational session. *Vaccine*, S0264-410X(19)31517-8. Advance online publication. doi:10.1016/j.vaccine.2019.11.010
27. **Tambe, T. A., Tchetnya, X., Nkfusai, C. N., Shirinde, J., & Cumber, S. N. (2019).** Reasons for non-compliance to immunization among Fulani children aged between 0-11 months in the Vekovi community in Cameroon. *The Pan African medical journal*, 33, 278. doi:10.11604/pamj.2019.33.278.16900
28. **Hvass, A. M. F. Wejse, C. (2019).** High coverage of polio immunization program in refugees resettling in Denmark. A cross-sectional study of polio serology in newly arrived refugees. *Expert Review of Vaccines*, 18.12, 1317-1322 doi: 10.1080/14760584.2019.1698953

Section 1: Please provide the current title of manuscript

Manuscript ID no.: PUBH-D-19-04480R1

Title: BARRIERS TO CHILDHOOD IMMUNIZATION IN SUBSAHARAN AFRICA: A SYSTEMATIC REVIEW

Section 2: Please provide the previous authorship, in the order shown on the manuscript before the changes were introduced. Please indicate the corresponding author by adding (CA) behind the name.

|                         | First name(s)   | Family name | ORCID or SCOPUS id, if available |
|-------------------------|-----------------|-------------|----------------------------------|
| 1 <sup>st</sup> author  | JOSEPH BENJAMIN | BANIGURA    | ORCID: 0000-0003-0042-7126       |
| 2 <sup>nd</sup> author  | SHUI YUAN       | XIAO (CA)   |                                  |
| 3 <sup>rd</sup> author  | LEI             | CHEN        |                                  |
| 4 <sup>th</sup> author  | DAN             | YU          |                                  |
| 5 <sup>th</sup> author  | FEIYUN          | QIYANG      |                                  |
| 6 <sup>th</sup> author  |                 |             |                                  |
| 7 <sup>th</sup> author  |                 |             |                                  |
| 8 <sup>th</sup> author  |                 |             |                                  |
| 9 <sup>th</sup> author  |                 |             |                                  |
| 10 <sup>th</sup> author |                 |             |                                  |

Please use an additional sheet if there are more than 10 authors.

Section 3: Please provide a justification for change. Please use this section to explain your reasons for changing the authorship of your manuscript, e.g. what necessitated the change in authorship? Please refer to the (journal) policy pages for more information about authorship. Please explain why omitted authors were not originally included and/or why authors were removed on the submitted manuscript.

We did not remove or add new author. We rearranged the list, i.e. LEI CHEN moved from 3<sup>rd</sup> to 5<sup>th</sup> position. LEI CHEN was instrumental in the supervision and revision of the final manuscript.

Section 4: Proposed new authorship. Please provide your new authorship list in the order you would like it to appear on the manuscript. Please indicate the corresponding author by adding (CA) behind the name. If the Corresponding Author has changed, please indicate the reason under section 3.

|                         | First name(s)   | Family name (this name will appear in full on the final publication and will be searchable in various abstract and indexing databases) | Affiliated institute                  | E-mail address          |
|-------------------------|-----------------|----------------------------------------------------------------------------------------------------------------------------------------|---------------------------------------|-------------------------|
| 1 <sup>st</sup> author  | JOSEPH BENJAMIN | IBANGURA                                                                                                                               | XIANGYA SCHOOL OF PUBLIC HEALTH, CSU. | jbangurab@yahoo.com     |
| 2 <sup>nd</sup> author  | SHUFEIYUAN      | XIAO (CA)                                                                                                                              | XIANGYA SCHOOL OF PUBLIC HEALTH, CSU. | shuifeiyuan1502@163.com |
| 3 <sup>rd</sup> author  | DAN             | YU                                                                                                                                     | XIANGYA SCHOOL OF PUBLIC HEALTH, CSU. | 166911058@csu.edu.cn    |
| 4 <sup>th</sup> author  | FEIYUN          | DUYANG                                                                                                                                 | XIANGYA SCHOOL OF PUBLIC HEALTH, CSU. | feiyund316@foxmail.com  |
| 5 <sup>th</sup> author  | LEI             | CHEN                                                                                                                                   | YALE UNIVERSITY SCHOOL OF MEDICINE    | lei.chen@yale.edu       |
| 6 <sup>th</sup> author  |                 |                                                                                                                                        |                                       |                         |
| 7 <sup>th</sup> author  |                 |                                                                                                                                        |                                       |                         |
| 8 <sup>th</sup> author  |                 |                                                                                                                                        |                                       |                         |
| 9 <sup>th</sup> author  |                 |                                                                                                                                        |                                       |                         |
| 10 <sup>th</sup> author |                 |                                                                                                                                        |                                       |                         |

Please use an additional sheet if there are more than 10 authors.

Section 5: Author contribution, Acknowledgement and Disclosures. Please use this section to provide a new disclosure statement and, if appropriate, acknowledge any contributors who have been removed as authors and ensure you state what contribution any new authors made (if applicable per the journal or book (series) policy). Please ensure these are updated in your manuscript - after approval of the change(s) - as our production department will not transfer the information in this form to your manuscript.

New acknowledgements:

NOT APPLICABLE

New Disclosures (financial and non-financial interests, funding):

NOT APPLICABLE

New Author Contributions statement (if applicable per the journal policy):

NOT APPLICABLE

State 'Not applicable' if there are no new authors.

Section 6: Declaration of agreement. All authors, unchanged, new and removed must sign this declaration.

Please print the form, fill out sign and return online as a scanned copy. Please note that signatures that have been provided as an image file are not acceptable. If you are using a scanner, please ensure that the signature is clear and legible. Please delete as appropriate. Delete all of the bold if you were on the original authorship list and are remaining as an author.

|                         | First name         | Family name |                                                                                                                                                                        | Signature                                                                          | Date      |
|-------------------------|--------------------|-------------|------------------------------------------------------------------------------------------------------------------------------------------------------------------------|------------------------------------------------------------------------------------|-----------|
| 1 <sup>st</sup> author  | JOSEPH<br>BENJAMIN | ISANOCURA   | I agree to the proposed new authorship shown in section 4 /and the addition/removal of my name to the authorship list /and the proposed change in corresponding author |  | 9-03-2020 |
| 2 <sup>nd</sup> author  | SHUYUAN            | XIAO (CA)   | I agree to the proposed new authorship shown in section 4 /and the addition/removal of my name to the authorship list /and the proposed change in corresponding author | Shuyuan Xiao                                                                       | 14-3-2020 |
| 3 <sup>rd</sup> author  | DAN                | QIU         | I agree to the proposed new authorship shown in section 4 /and the addition/removal of my name to the authorship list /and the proposed change in corresponding author | Dan Qiu                                                                            | 16-3-2020 |
| 4 <sup>th</sup> authors | FEIXUN             | OUYANG      | I agree to the proposed new authorship shown in section 4 /and the addition/removal of my name to the authorship list /and the proposed change in corresponding author | Feixun Ouyang                                                                      | 11-3-2020 |
| 5 <sup>th</sup> author  | LEI                | CHEN        | I agree to the proposed new authorship shown in section 4 /and the addition/removal of my name to the authorship list /and the proposed change in corresponding author | Lei Chen                                                                           | 11-3-2020 |
| 6 <sup>th</sup> author  |                    |             | I agree to the proposed new authorship shown in section 4 /and the addition/removal of my name to the authorship list /and the proposed change in corresponding author |                                                                                    |           |
| 7 <sup>th</sup> author  |                    |             | I agree to the proposed new authorship shown in section 4 /and the addition/removal of my name to the authorship list /and the proposed change in corresponding author |                                                                                    |           |

**SPRINGER NATURE** Springer Nature is one of the world's leading global research, educational and professional publishers, created in May 2015 through the combination of Nature Publishing Group, Palgrave Macmillan, Macmillan Education and Springer Science+Business Media.
